# Supplementary material for: The Rashba effect in two-dimensional hybrid perovskites: the impacts of halogens and surface ligands
Source: Royal Society of Chemistry journal article supplement (doi:10.1039/d2cp03971k), 2022-01-01
Supplement: d2cp03971k1.pdf [file d2cp03971k1.pdf]

STable.1 The  $\Delta\theta_{Cl}$  ( $^{\circ}$ ) parameters representing the distortion degrees of 2D MAPbCl<sub>3</sub>.

| Layers | 1L   | 2L   | 3L   | 4L   |
|--------|------|------|------|------|
| S1     | 27.1 | 12.7 | 9.6  | 8.0  |
| S2     |      | 12.8 | 13.8 | 8.7  |
| S3     |      |      | 9.7  | 8.7  |
| S4     |      |      |      | 13.5 |

STable.2 The effective masses ( $m_0$ ) of electrons at CBM and holes at VBM of 2D HOIPs, denoted by  $m_e$  and  $m_h$  respectively. Note that  $m_0$  is the rest mass of a free electron.

| $m(m_0)$ | MAPbCl <sub>3</sub> |       | MAPbBr <sub>3</sub> |       | MAPbI <sub>3</sub> |       |
|----------|---------------------|-------|---------------------|-------|--------------------|-------|
|          | $m_e$               | $m_h$ | $m_e$               | $m_h$ | $m_e$              | $m_h$ |
| 1L       | 0.278               | 0.359 | 0.192               | 0.319 | 0.109              | 0.208 |
| 2L       | 0.207               | 0.338 | 0.113               | 0.269 | 0.069              | 0.136 |
| 3L       | 0.163               | 0.280 | 0.101               | 0.144 | 0.072              | 0.120 |
| 4L       | 0.158               | 0.264 | 0.094               | 0.127 | 0.066              | 0.076 |

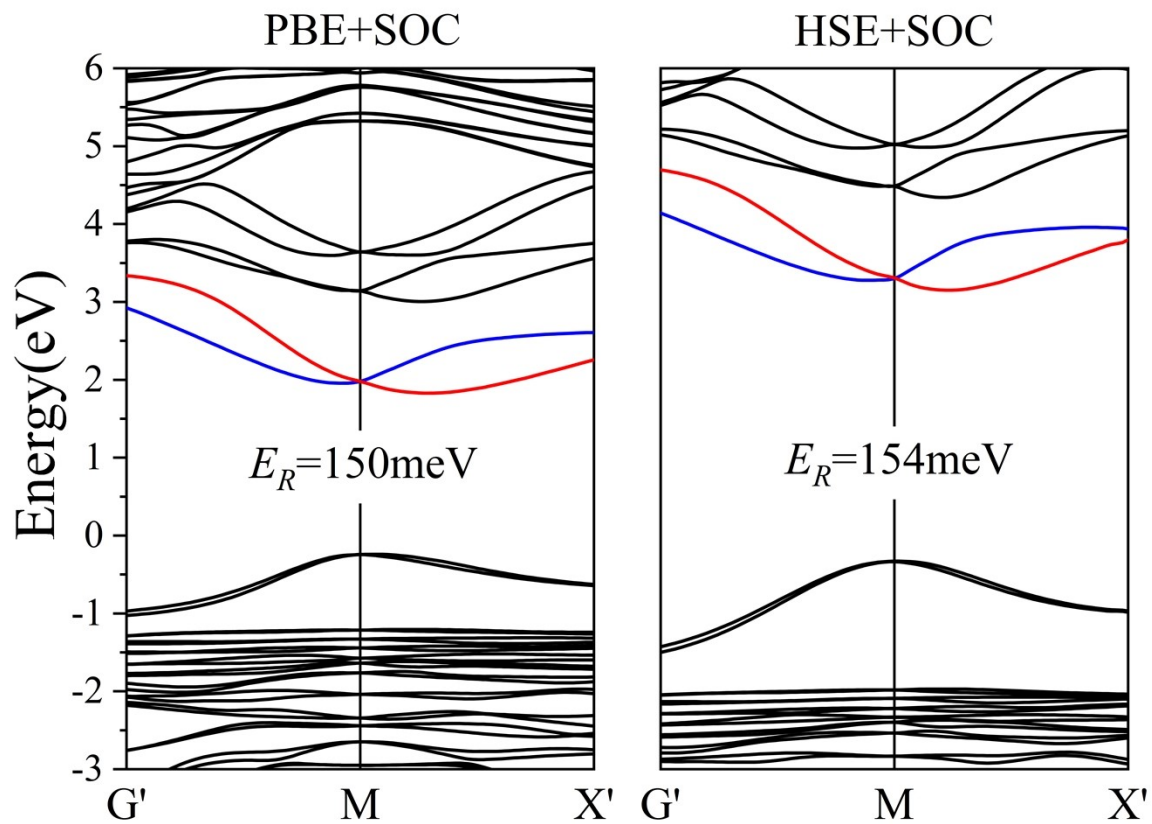

SFig.1 The comparison calculation between adopting PBE+SOC or HSE+SOC method on the energy bands near M point of 1L MAPbBr<sub>3</sub>.

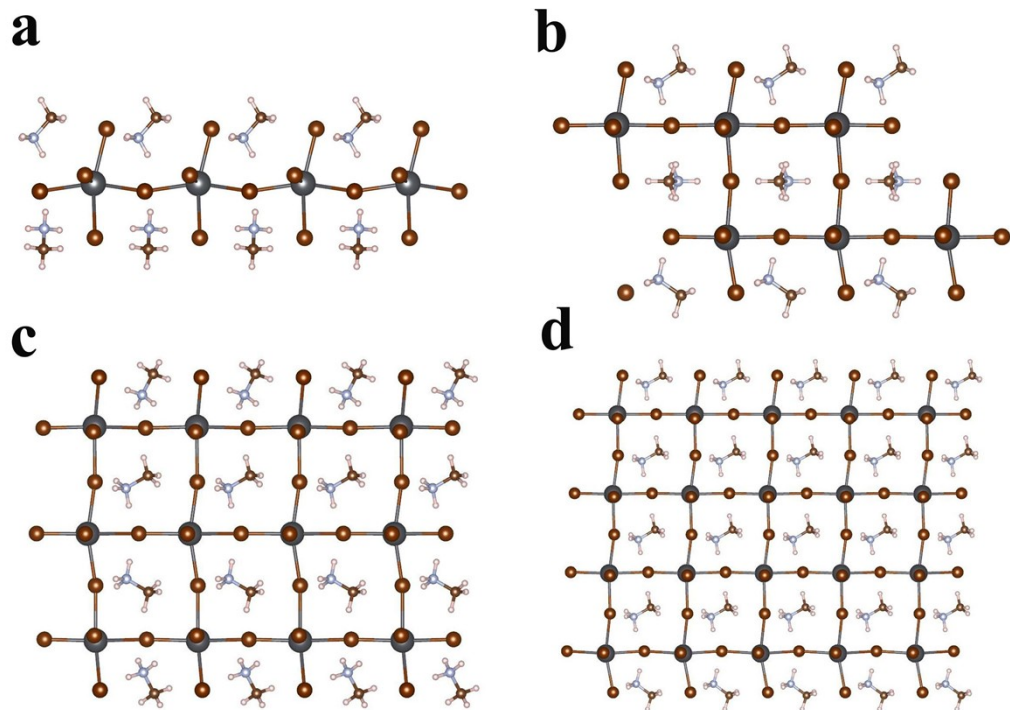

SFig.2 The structures for 2D MAPbBr<sub>3</sub>: (a) 1L, (b) 2L, (c) 3L, (d) 4L.

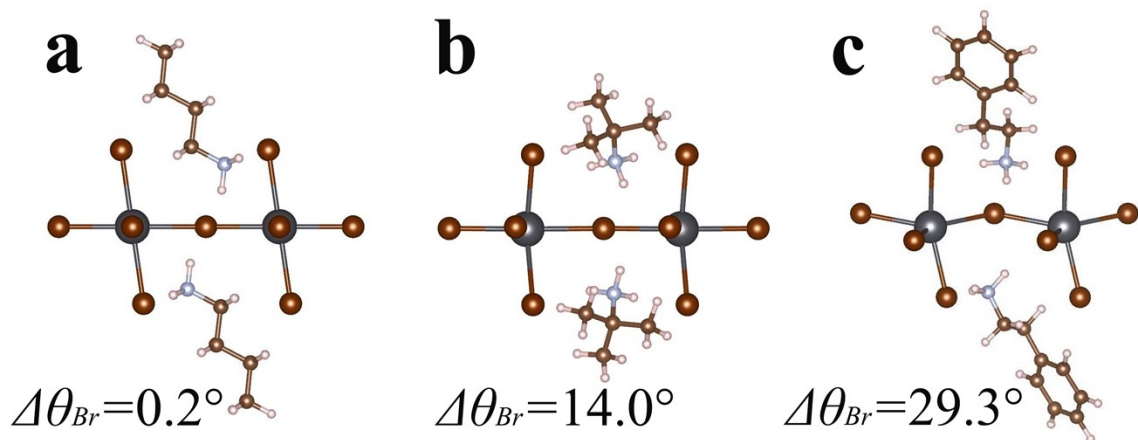

SFig.3 The structures of (a) 1L BA-MAPbBr<sub>3</sub>, (b) 1L tert-BA-MAPbBr<sub>3</sub> and (c) 1L PEA-MAPbBr<sub>3</sub>. The structural distortion parameters are denoted as  $\Delta\theta_{Br}$ .

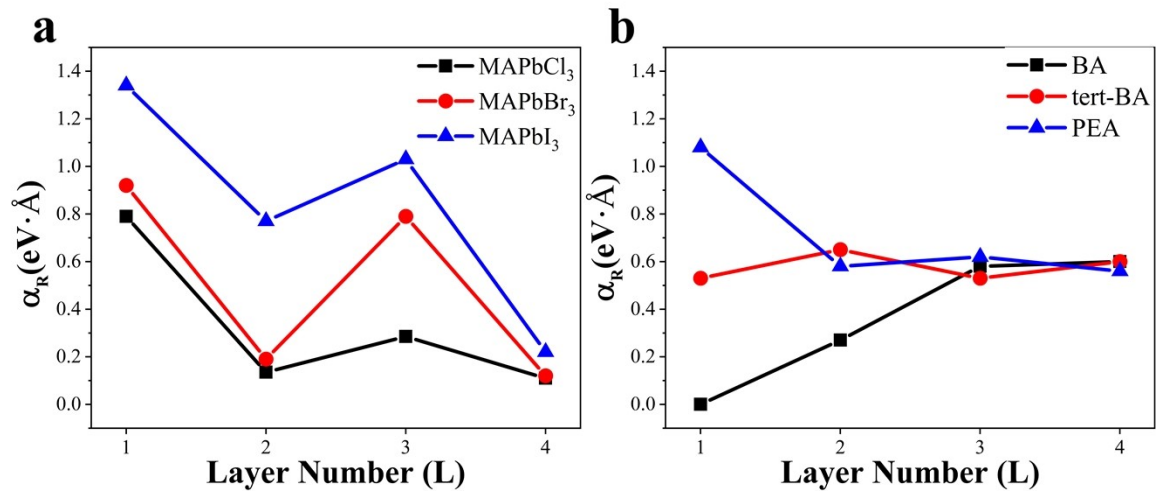

SFig.4  $\alpha_R$  parameters for (a) MAPbX<sub>3</sub> (X=Cl, Br, I) without ligands and (b) MAPbBr<sub>3</sub> with BA, tert-BA and PEA ligands.

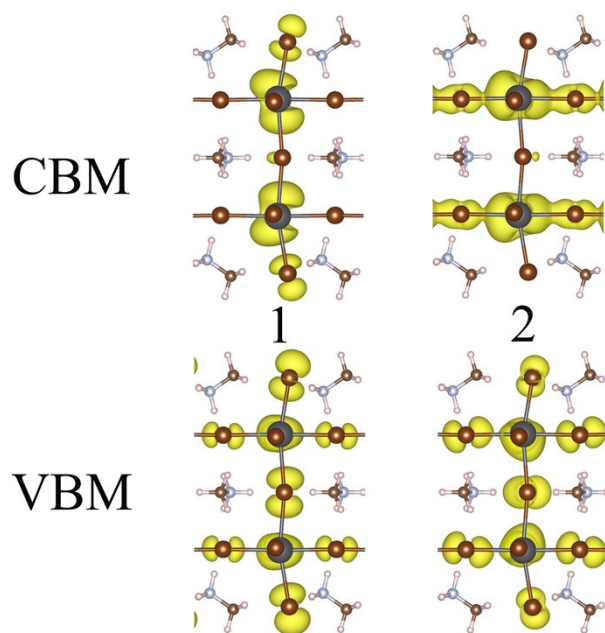

SFig.5 The partial charge density of different CBMs and VBMs for 2L MAPbBr<sub>3</sub>.

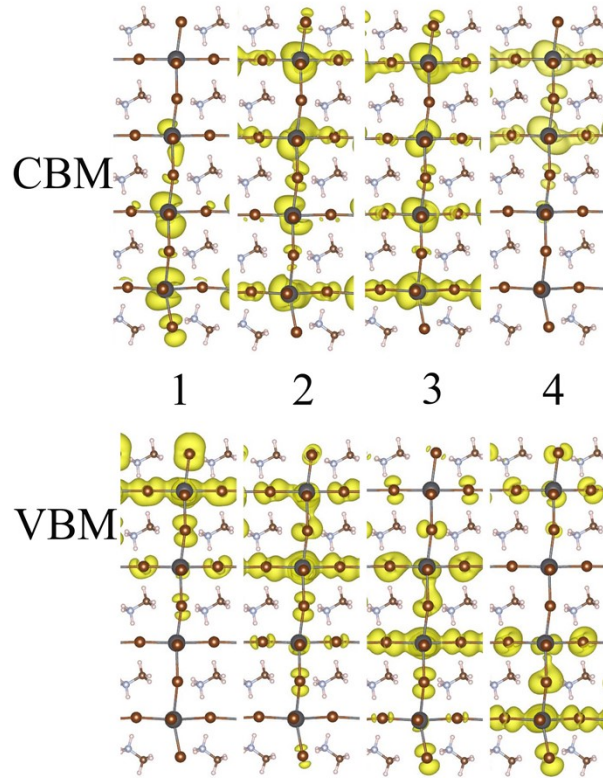

SFig.6 The partial charge density of different CBMs and VBMs for 4L MAPbBr<sub>3</sub>.

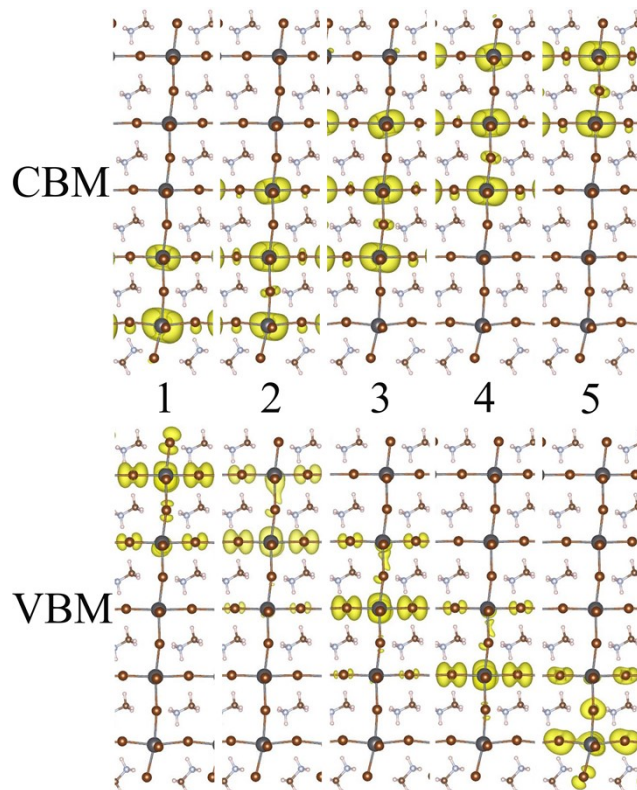

SFig.7 The partial charge density of different CBMs and VBMs for 5L MAPbBr<sub>3</sub>.
